# Supplementary material
Source: publisher site journal article supplement (https://www.spandidos-publications.com/6758/downloadSupplementary)
Supplement: Supplementary file 1 [file downloadSupplementary]

Table SI. Thermocycling protocol.

| Protocol step | Temperature | Time   | Number of cycles |
|---------------|-------------|--------|------------------|
| Step 1        | 95°C        | 10 min |                  |
| Step 2a       | 95°C        | 15 sec | 44 cycles        |
| Step 2b       | 56°C        | 1 min  | 44 cycles        |
| Step 3        | 98°C        | 10 min |                  |

Sample ramp rate: 1.7°C/sec.

Table SII. Details on primers and probes.

| Targeted sequence | Fluorophore | Probe sequence, 5'-3'         | Final conc., $\mu\text{M}$ | Forward primer sequence, 5'-3' (stock conc. 4 $\mu\text{M}$ ) | Reverse primer sequence, 5'-3' (stock conc. 4 $\mu\text{M}$ ) |
|-------------------|-------------|-------------------------------|----------------------------|---------------------------------------------------------------|---------------------------------------------------------------|
| Albumin           | VIC         | AGGGTTTTTA<br>TAATTTA         | 0.4                        | GGGATGGAAAGAATT<br>TTATGTT                                    | AAACAAACTAACCC<br>CAAATTCT                                    |
| <i>HOXA9</i>      | FAM         | TTAGTTTAAG<br>GCGACGGTGT<br>T | 0.2                        | GAGTATTTTCGATTTTA<br>GTTCGTGT                                 | CGCGTACACTAAATT<br>CCAC                                       |

Primers and *HOXA9* probes were purchased from LGC Biosearch Technologies (Aarhus, Denmark), and the albumin probe from Thermo Fisher Scientific (Waltham, MA, USA).

Table SIII. HER2 assessment criteria in breast cancer.

| A, HER2 IHC  |                                                                                                                          |
|--------------|--------------------------------------------------------------------------------------------------------------------------|
| Result       | Assessment                                                                                                               |
| Score 0      | No staining or membrane staining that is faint or barely perceptible and within $\leq 10\%$ of the invasive tumor cells. |
| Score 1+     | Incomplete membrane staining that is faint or barely perceptible and within $\geq 10\%$ of the invasive tumor cells.     |
| Score 2+     | Weak to moderate complete membrane staining $> 10\%$ of invasive tumor cells.                                            |
| Score 3+     | Circumferential membrane staining that is complete, intense, and in $>10\%$ of invasive tumor cells.                     |
| B, HER2 SISH |                                                                                                                          |
| Result       | Assessment                                                                                                               |
| Positive     | HER2 gene copy number and chromosome 17 centromere ratio $\geq 2.0$ .                                                    |
| Negative     | HER2 gene copy number and chromosome 17 centromere ratio $< 2.0$ .                                                       |

HER2, human epidermal growth factor receptor 2; IHC, immunohistochemistry; SISH, silver *in situ* hybridization.

Table SIV. Estrogen receptor assessment criteria in breast cancer.

| Result   | Assessment                                                                                                                                                                    |
|----------|-------------------------------------------------------------------------------------------------------------------------------------------------------------------------------|
| Positive | $\geq 1\%$ of tumor cell nuclei are immunoreactive, but if 1-9% of tumor cell nuclei are immunoreactive, the sample is reported with an additional comment of 'low positive'. |
| Negative | $< 1\%$ of tumor cell nuclei are immunoreactive.                                                                                                                              |

Table SV. Subgroup analysis of meth-*HOXA9* in primary breast-cancer tissue. Log-rank test of the association between tumor meth-*HOXA9* and mortality in ER-positive/HER2-negative disease.

| Status                         | Events   |          | P-value |
|--------------------------------|----------|----------|---------|
|                                | Observed | Expected |         |
| Meth- <i>HOXA9</i> in plasma + | 28       | 26.4     | 0.476   |
| Meth- <i>HOXA9</i> in plasma - | 5        | 6.6      |         |

ER, estrogen receptor; HER2, human epidermal growth factor receptor 2; meth-*HOXA9*, methylated homeobox A9.

Table SVI. Subgroup analysis of meth-*HOXA9* in primary breast-cancer tissue. Log-rank test of the association between tumor meth-*HOXA9* and mortality in HER2-positive disease.

| Status                         | Events   |          | P-value |
|--------------------------------|----------|----------|---------|
|                                | Observed | Expected |         |
| Meth- <i>HOXA9</i> in plasma + | 4        | 2.6      | 0.126   |
| Meth- <i>HOXA9</i> in plasma - | 0        | 1.4      |         |

HER2, human epidermal growth factor receptor 2; meth-*HOXA9*, methylated homeobox A9.

Table SVII. Subgroup analysis of meth-*HOXA9* in primary breast-cancer tissue. Log-rank test of the association between tumor meth-*HOXA9* and mortality in triple-negative disease.

| Status                         | Events   |          | P-value |
|--------------------------------|----------|----------|---------|
|                                | Observed | Expected |         |
| Meth- <i>HOXA9</i> in plasma + | 2        | 1.3      | 0.433   |
| Meth- <i>HOXA9</i> in plasma - | 2        | 2.7      |         |

meth-*HOXA9*, methylated homeobox A9.

Table SVIII. Sensitivity analysis of meth-*HOXA9* in primary breast-cancer tissue. HR with 95% CI of breast-cancer mortality according to breast-cancer tissue meth-*HOXA9* status (n=44) after exclusion of patients who received neoadjuvant chemotherapy.

| Status                          | Mortality, n | Incidence, %<br>(95% CI) | Unadjusted HR<br>(95% CI) | Adjusted <sup>a</sup> HR<br>(95% CI) |
|---------------------------------|--------------|--------------------------|---------------------------|--------------------------------------|
| Undetectable meth- <i>HOXA9</i> | 7            | 87.50 (44.77-98.37)      | Ref.                      | Ref.                                 |
| Detectable meth- <i>HOXA9</i>   | 30           | 83.33 (66.99-92.49)      | 0.99 (0.43-2.29)          | 1.07 (1.01-1.12)                     |

<sup>a</sup>Adjusted for age at primary operation. CI, confidence interval; HR, hazard ratio; meth-*HOXA9*, methylated homeobox A9.

Table SIX. Subgroup analysis of meth-*HOXA9* in plasma at the time of breast cancer recurrence. Log-rank test of the association between plasma meth-*HOXA9* and mortality in ER-positive/HER2- negative disease according to receptor status in the metastasis.

| Status                         | Events   |          | P-value |
|--------------------------------|----------|----------|---------|
|                                | Observed | Expected |         |
| Meth- <i>HOXA9</i> in plasma + | 14       | 6.7      | 0.180   |
| Meth- <i>HOXA9</i> in plasma - | 4        | 11.3     |         |

ER, estrogen receptor; HER2, human epidermal growth factor receptor 2; meth-*HOXA9*, methylated homeobox A9.

Table SX. Subgroup analysis of meth-*HOXA9* in plasma at the time of breast cancer recurrence. Log-rank test of the association between plasma meth-*HOXA9* and mortality in HER2-positive disease according to receptor status in the metastasis.

| Status                         | Events   |          | P-value |
|--------------------------------|----------|----------|---------|
|                                | Observed | Expected |         |
| Meth- <i>HOXA9</i> in plasma + | 1        | 0.3      | 0.157   |
| Meth- <i>HOXA9</i> in plasma - | 0        | 0.7      |         |

HER2, human epidermal growth factor receptor 2; meth-*HOXA9*, methylated homeobox A9.

Table SXI. Subgroup analysis of meth-*HOXA9* in plasma at the time of breast cancer recurrence. Log-rank test of the association between plasma meth-*HOXA9* and mortality in triple-negative disease according to receptor status in the metastasis.

| Status                         | Events   |          | P-value |
|--------------------------------|----------|----------|---------|
|                                | Observed | Expected |         |
| Meth- <i>HOXA9</i> in plasma + | 2        | 1.6      | 0.707   |
| Meth- <i>HOXA9</i> in plasma - | 4        | 4.4      |         |

meth-*HOXA9*, methylated homeobox A9.

Table SXII. Sensitivity analysis of meth-*HOXA9* in plasma at the time of breast cancer recurrence. HR with 95% CI of mortality after breast cancer recurrence according to plasma meth-*HOXA9* status (n=34) after re-classification of patients with  $\leq 200$   $\mu$ l plasma.

| Status                          | Mortality, n | Incidence, %<br>(95% CI) | Unadjusted HR<br>(95% CI) | Adjusted <sup>a</sup> HR<br>(95% CI) |
|---------------------------------|--------------|--------------------------|---------------------------|--------------------------------------|
| Undetectable meth- <i>HOXA9</i> | 8            | 72.72 (40.21-91.36)      | Ref.                      | Ref.                                 |
| Detectable meth- <i>HOXA9</i>   | 18           | 78.26 (56.28-90.97)      | 1.57 (0.68-3.64)          | 2.23 (0.92-5.44)                     |

<sup>a</sup>Adjusted for age at recurrence. CI, confidence interval; HR, hazard ratio; meth-*HOXA9*, methylated homeobox A9.

Table SXIII. Sensitivity analysis of meth-*HOXA9* in plasma and metastatic tissue at breast cancer recurrence. Comparison of metastatic tissue and plasma meth-*HOXA9* using Fisher's exact test (n=20) after re-classification of patients with  $\leq 200$   $\mu$ l plasma.

| Status                         | Meth- <i>HOXA9</i> in metastatic tissue |           | P-value |
|--------------------------------|-----------------------------------------|-----------|---------|
|                                | +                                       | -         |         |
| Meth- <i>HOXA9</i> in plasma + | 14 (93.3%)                              | 1 (6.7%)  | 0.447   |
| Meth- <i>HOXA9</i> in plasma - | 4 (80.0%)                               | 1 (20.0%) |         |

meth-*HOXA9*, methylated homeobox A9.
